# Supplementary material
Source: Springer Nature journal article supplement (https://www.springermedizin.de/resource/supplementary/12881_2011_948_MOESM1_ESM.pdf/9451662)

A

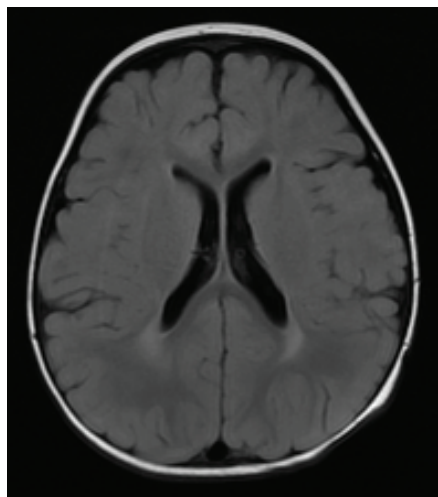

B

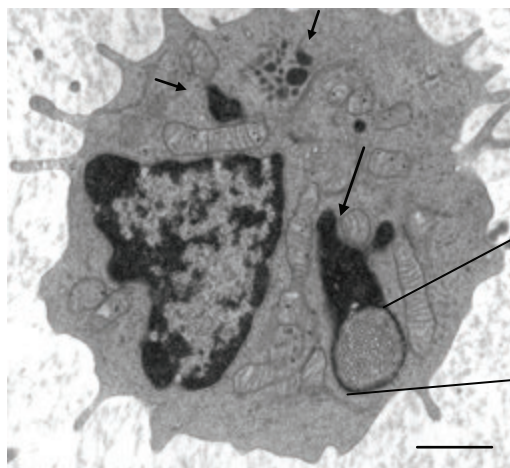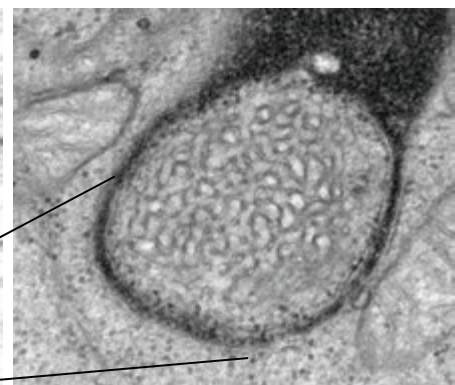

C

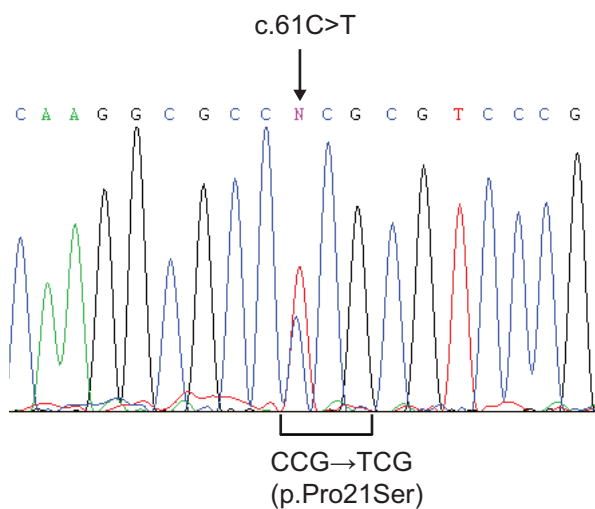

Chr13:77564504

Chr13:77577998

proband

father

mother

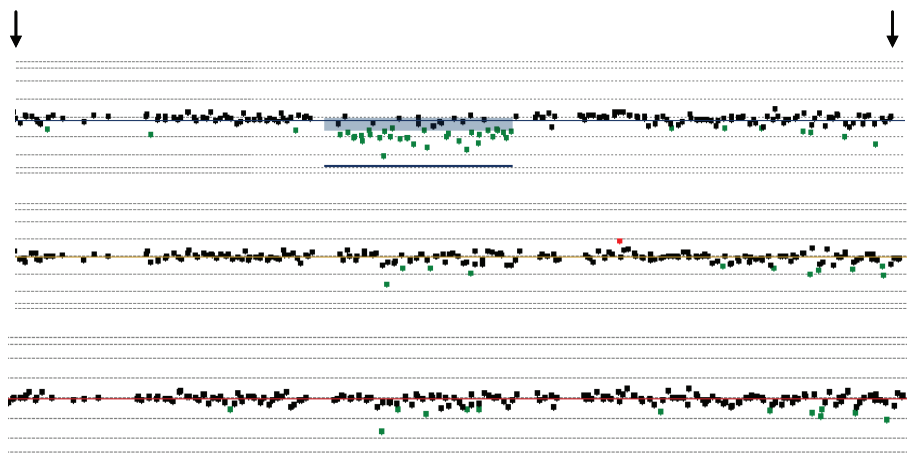

Supplement: MOESM1 [file 9451662]
